# Supplementary material
Source: ML conference proceedings conference paper supplement (https://proceedings.neurips.cc/paper_files/paper/2023/hash/fc0cc55dca3d791c4a0bb2d8ddeefe4f-Abstract.html)
Supplement: Supplementary file 1 [file fc0cc55dca3d791c4a0bb2d8ddeefe4f-Supplemental-Conference.pdf]

---

# Supplementary Material for SegRefiner: Towards Model-Agnostic Segmentation Refinement with Discrete Diffusion Process

---

Anonymous Author(s)

Affiliation

Address

email

## 1 Implementation Details

In this section, we give a detailed description of the model architecture and training/inference settings. The overall workflow of the training and inference process are provided in Alg. 1 and Alg. 2.

---

### Algorithm 1 Training

---

**Input** total diffusion steps  $T$ , datasets  $D = \{(I, M_{fine}, M_{coarse})^K\}$

**repeat**

    Sample  $(I, M_{fine}, M_{coarse}) \sim D$

    Sample  $t \sim Uniform(1, \dots, T)$

    Initialize  $m_0 = M_{fine}, x_0^{i,j} = [1, 0]$

$q(x_t^{i,j} | x_0^{i,j}) = x_0^{i,j} \bar{Q}_t$

    Sample  $x_t^{i,j} \sim q(x_t^{i,j} | x_0^{i,j})$ , get  $x_t \in \{0, 1\}^{2 \times H \times W}$

    Pixels Transition  $m_t = x_t[0] \odot M_{fine} + x_t[1] \odot M_{coarse}$

    Take gradient descent step on  $\nabla_{\theta} \mathcal{L}(f_{\theta}(I, m_t, t), M_{fine})$

**until** convergence

---



---

### Algorithm 2 Inference

---

**Input** total diffusion steps  $T$ , image and coarse mask  $(I, M_{coarse})$

**Initialize**  $x_T = [0, 1], m_T = M_{coarse}$

**for**  $t$  in  $\{T, T-1, \dots, 1\}$  **do**

$\tilde{m}_{0|t}, p_{\theta}(\tilde{m}_{0|t}) = f_{\theta}(I, m_t, t)$

$p_{\theta}(x_{t-1}^{i,j} | x_t^{i,j}) = x_t^{i,j} P_{\theta,t}^{i,j}$

    Sample  $x_{t-1}^{i,j} \sim p_{\theta}(x_{t-1}^{i,j} | x_t^{i,j})$ , get  $x_t \in \{0, 1\}^{2 \times H \times W}$

    Pixels Transition  $m_{t-1} = x_{t-1}[0] \odot \tilde{m}_{0|t} + x_{t-1}[1] \odot M_{coarse}$

**return**  $m_0$

---

**Model Architecture** Following [9], we use a U-Net with 4-channel input and 1-channel output. Both input and output resolution is set to  $256 \times 256$ . Considering computational load and memory usage, we set the intermediate feature channels to 128 and only conduct *self-attention* in strides 16 and 32.

9 **Training Settings** All experiments are conducted on 8 NVIDIA RTX3090 GPUs with Pytorch.  
 10 During training, we first train the *LR-SegRefiner* on the LVIS dataset [4] with 120k iterations. The  
 11 AdamW optimizer is used with the initial learning rate of  $4 \times 10^{-4}$ . We use a multi-step learning rate  
 12 schedule, which decays by 0.5 in steps 80k and 100k. Subsequently, the *HR-SegRefiner* is obtained  
 13 from 40k-iterations fine-tuning based on the 80k checkpoint of *LR-SegRefiner*. Batch size is set to 8  
 14 in each GPU.

15 **Inference Settings** In instance segmentation, we use the *LR-SegRefiner* to perform refinement in  
 16 instance level. For each instance, we extract the bounding box region based on the coarse mask and  
 17 expand it by 20 pixels on each side. The extracted region is then resized to match the input size of  
 18 the model. After a complete reverse diffusion process, the output is resized to the original size.

19 In semantic segmentation and dichotomous image segmentation, because of the high resolution of  
 20 images, we employ the *HR-SegRefiner* and conduct a global-and-local refinement process. In order  
 21 to identify the local patches that require refinement, we filter out pixels with low state-transition  
 22 probabilities from the globally refined mask and use them as the center points for the local patches.  
 23 We apply Non-Maximum Suppression (NMS, with 0.3 as threshold) to these patches to remove  
 24 excessive overlapping.

## 25 2 More Visual Comparisons

26 In this section, we provide more visual results in semantic segmentation, instance segmentation, and  
 27 dichotomous image segmentation. Fig. 1 shows the comparisons of SegRefiner and other models (in-  
 28 cluding instance segmentation models and refinement models) on COCO [8] validation set. Fig. 2  
 29 shows more comparisons between the coarse masks and refined masks on COCO validation set.  
 30 These results demonstrate that the proposed SegRefiner can robustly correct inaccurate predictions in  
 31 coarse masks. Fig. 3 and Fig. 4 show visual results on BIG dataset [2] and DIS5K dataset [10]. Seg-  
 32 Refiner shows a strong capability for capturing extremely fine details on these two high-resolution  
 33 datasets.

## 34 References

- 35 [1] Liang-Chieh Chen, Yukun Zhu, George Papandreou, Florian Schroff, and Hartwig Adam. Encoder-  
 36 decoder with atrous separable convolution for semantic image segmentation. In *ECCV*, pages 801–818,  
 37 2018.
- 38 [2] Ho Kei Cheng, Jihoon Chung, Yu-Wing Tai, and Chi-Keung Tang. Cascadepsp: Toward class-agnostic  
 39 and very high-resolution segmentation via global and local refinement. In *CVPR*, pages 8890–8899, 2020.
- 40 [3] Yuxin Fang, Shusheng Yang, Xinggang Wang, Yu Li, Chen Fang, Ying Shan, Bin Feng, and Wenyu Liu.  
 41 Instances as queries. In *ICCV*, pages 6910–6919, 2021.
- 42 [4] Agrim Gupta, Piotr Dollar, and Ross Girshick. Lvis: A dataset for large vocabulary instance segmentation.  
 43 In *CVPR*, pages 5356–5364, 2019.
- 44 [5] Kaiming He, Georgia Gkioxari, Piotr Dollár, and Ross Girshick. Mask r-cnn. In *CVPR*, pages 2961–2969,  
 45 2017.
- 46 [6] Lei Ke, Martin Danelljan, Xia Li, Yu-Wing Tai, Chi-Keung Tang, and Fisher Yu. Mask transfiner for  
 47 high-quality instance segmentation. In *CVPR*, pages 4412–4421, 2022.
- 48 [7] Alexander Kirillov, Yuxin Wu, Kaiming He, and Ross Girshick. Pointrend: Image segmentation as ren-  
 49 dering. In *CVPR*, pages 9799–9808, 2020.
- 50 [8] Tsung-Yi Lin, Michael Maire, Serge Belongie, James Hays, Pietro Perona, Deva Ramanan, Piotr Dollár,  
 51 and C Lawrence Zitnick. Microsoft coco: Common objects in context. In *ECCV*, pages 740–755. Springer,  
 52 2014.
- 53 [9] Alexander Quinn Nichol and Prafulla Dhariwal. Improved denoising diffusion probabilistic models. In  
 54 *ICML*, pages 8162–8171. PMLR, 2021.
- 55 [10] Xuebin Qin, Hang Dai, Xiaobin Hu, Deng-Ping Fan, Ling Shao, and Luc Van Gool. Highly accurate  
 56 dichotomous image segmentation. In *ECCV*, pages 38–56. Springer, 2022.

- 57 [11] Chufeng Tang, Hang Chen, Xiao Li, Jianmin Li, Zhaoxiang Zhang, and Xiaolin Hu. Look closer to  
58 segment better: Boundary patch refinement for instance segmentation. In *CVPR*, pages 13926–13935,  
59 2021.
- 60 [12] Zhi Tian, Chunhua Shen, and Hao Chen. Conditional convolutions for instance segmentation. In *ECCV*,  
61 pages 282–298. Springer, 2020.
- 62 [13] Xinlong Wang, Tao Kong, Chunhua Shen, Yuning Jiang, and Lei Li. Solo: Segmenting objects by loca-  
63 tions. In *ECCV*, pages 649–665. Springer, 2020.
- 64 [14] Yuhui Yuan, Jingyi Xie, Xilin Chen, and Jingdong Wang. Segfix: Model-agnostic boundary refinement  
65 for segmentation. In *ECCV*, pages 489–506. Springer, 2020.
- 66 [15] Gang Zhang, Xin Lu, Jingru Tan, Jianmin Li, Zhaoxiang Zhang, Quanquan Li, and Xiaolin Hu. Refine-  
67 mask: Towards high-quality instance segmentation with fine-grained features. In *CVPR*, pages 6861–  
68 6869, 2021.

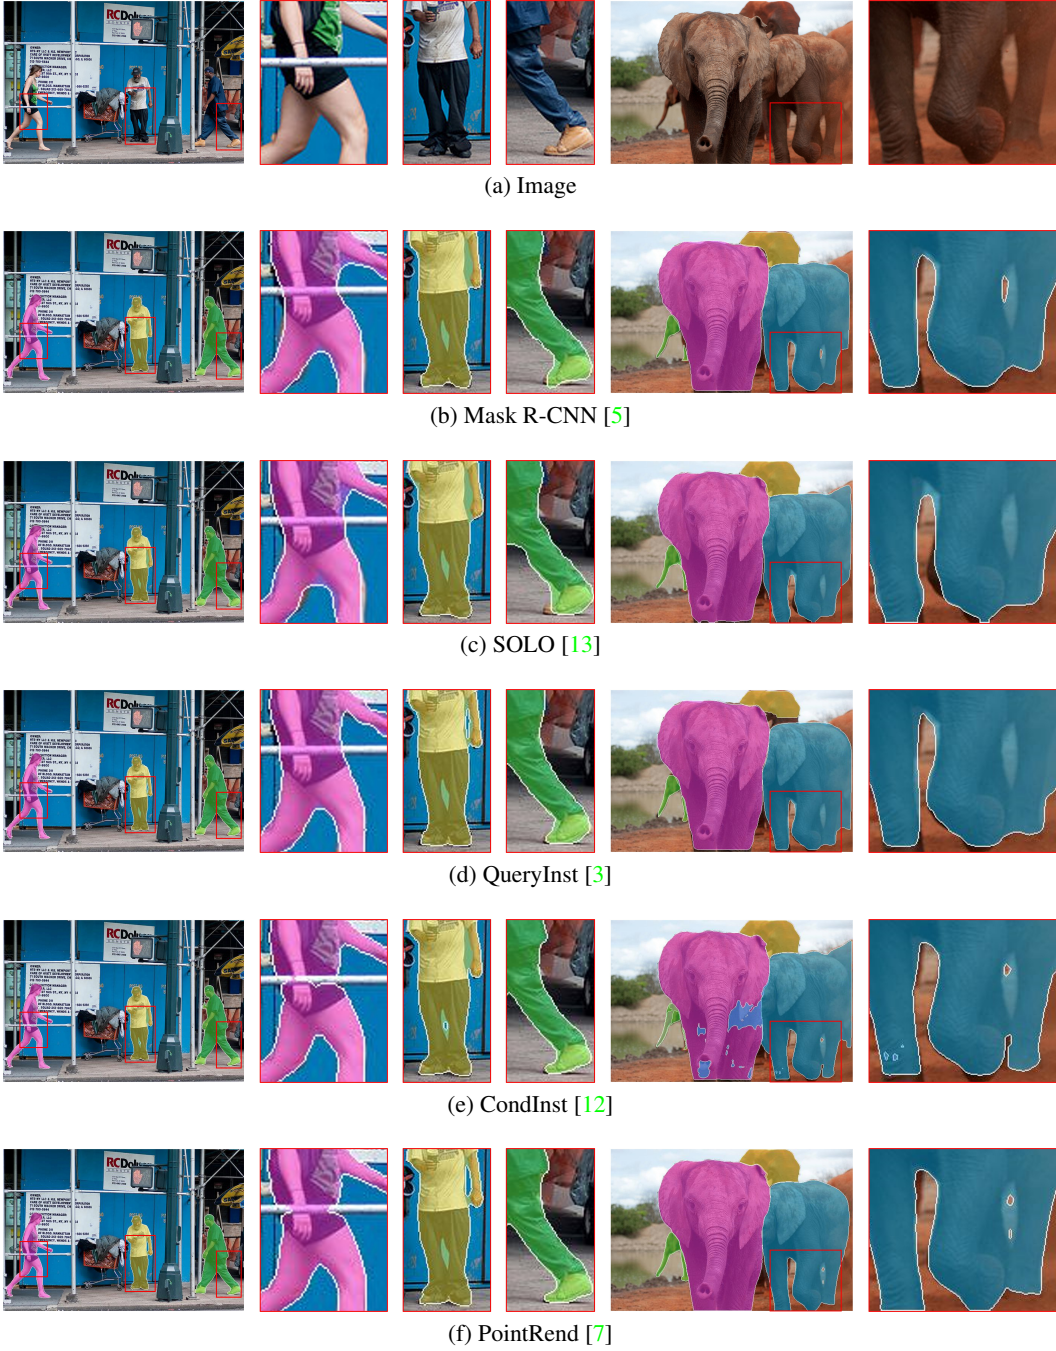

Figure 1: Visual comparisons with other instance segmentation and refinement methods on COCO dataset. Our SegRefiner can robustly correct prediction errors both outside and inside the coarse mask. (Please refer to the next page for the remaining portion of this figure.)

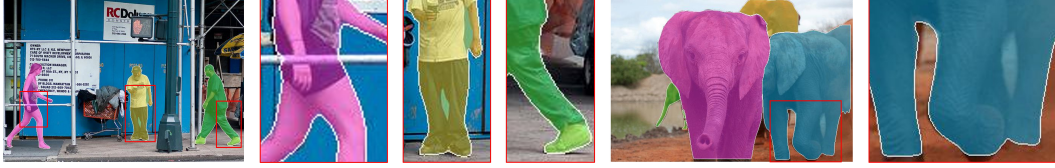

(g) RefineMask [15]

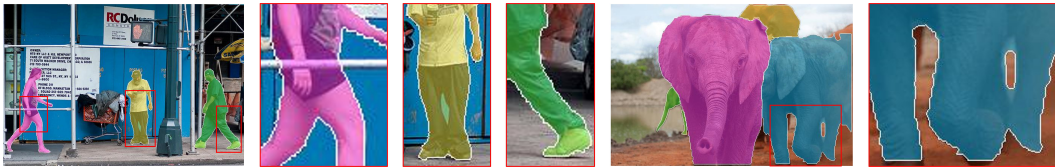

(h) Transfuser [6]

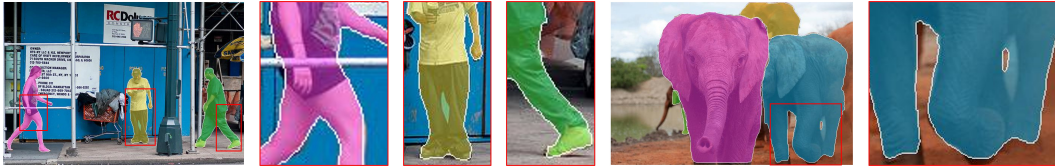

(i) Mask R-CNN + SegFix [14]

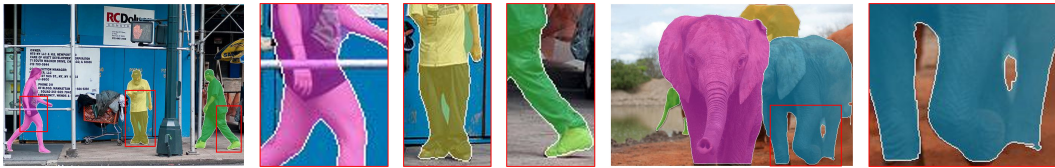

(j) Mask R-CNN + BPR [11]

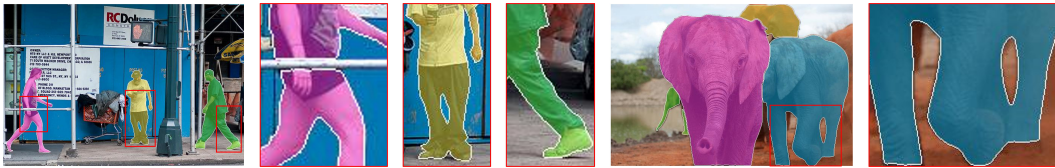

(k) Mask R-CNN + SegRefiner (Ours)

Figure 1: Visual comparisons with other instance segmentation and refinement methods on COCO dataset. Our SegRefiner can robustly correct prediction errors both outside and inside the coarse mask.

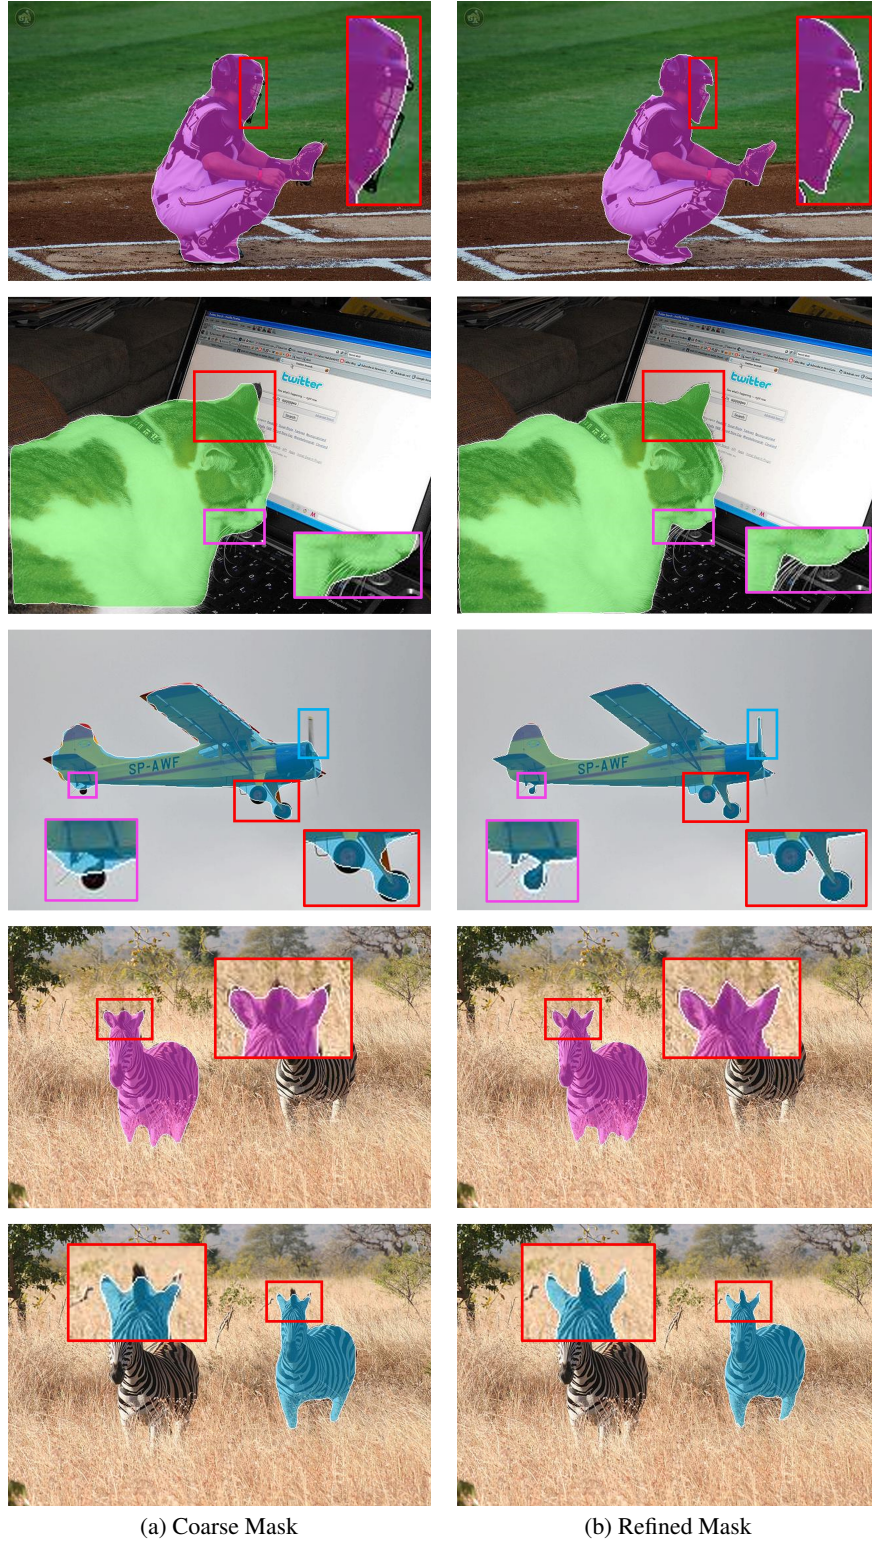

Figure 2: More visual results on COCO dataset. Coarse masks are obtained from Mask R-CNN [5]. Our SefRefiner corrects the errors of coarse masks (see Refined Mask).

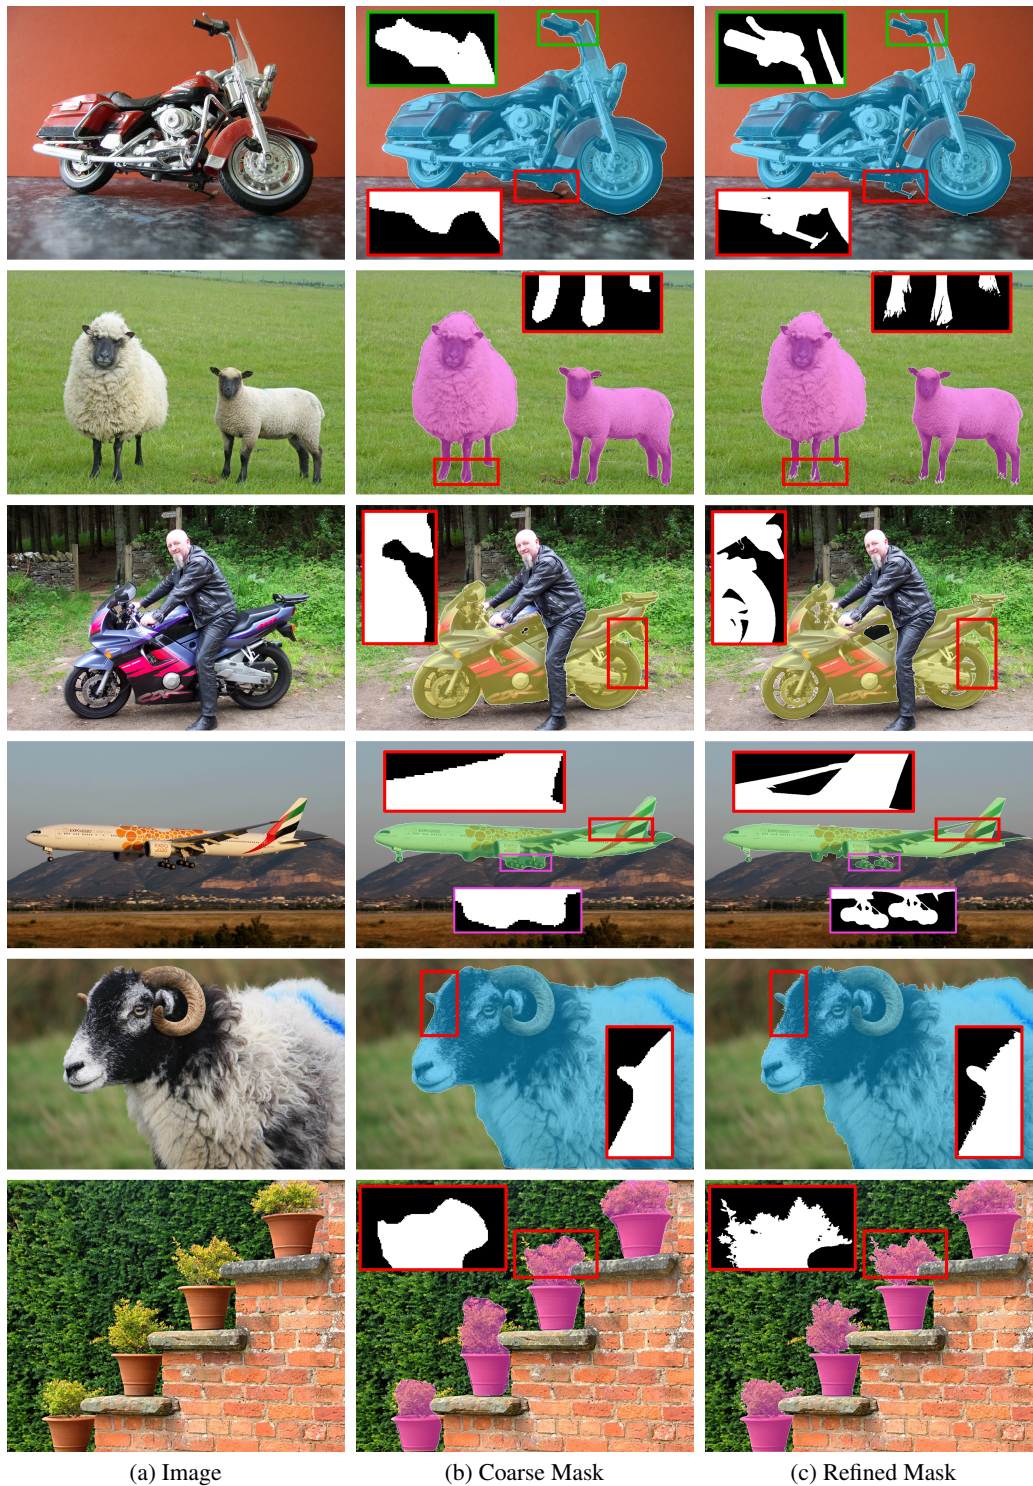

Figure 3: More visual results on BIG dataset [2]. Coarse masks are obtained from Deeplab v3+ [1]. Our SefRefiner greatly enhances the mask quality (see Refined Mask). Please kindly zoom in for a better view.

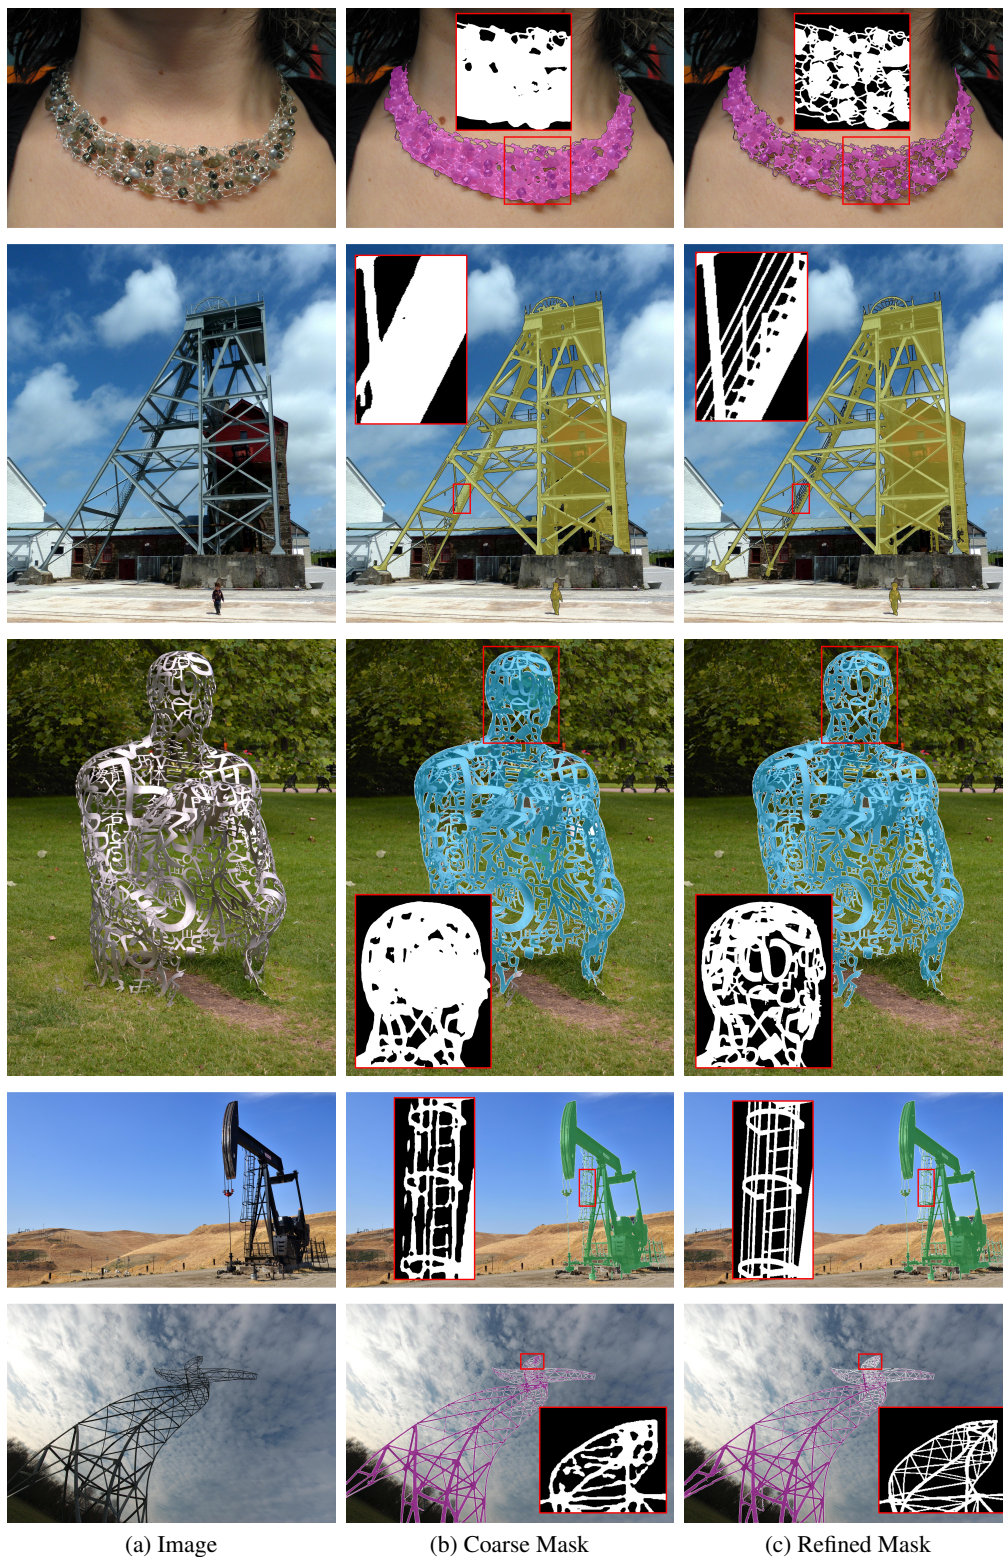

Figure 4: More visual results on DIS5K dataset [10]. Coarse masks are obtained from ISNet [10]. Our SefRefiner captures extremely fine details (see Refined Mask). Please kindly zoom in for a better view.
